# Supplementary material for: The role of online social networks in improving health literacy and medication adherence among people living with HIV/AIDS in Iran: Development of a conceptual model
Source: PLoS One. 2022 Jun 30;17(6):e0261304. doi: 10.1371/journal.pone.0261304 (PMC9246123; doi:10.1371/journal.pone.0261304)
Supplement: S2 File — (PDF) [file pone.0261304.s004.pdf]

**Code System [948]**

- anonymous identity [3]
- age [28]
- education [27]
- history of drug abuse [25]
- employment status [28]
- date of diagnosis [29]

**Sex [0]**

- male [18]
- female [11]
- way of transmission [28]
- Disease perception [16]
- Knowledge about HIV [45]
- Access to information [16]
- Emotional support [53]
- Informational support [67]
- Negative emotions [2]
- Instrumental support [10]
- Barriers [58]
- OSN app [39]
- OSN group [31]
- Recommendations for OSN improvements [45]
- Time of using OSN [25]
- Overall impression [70]
- Self efficacy & self-care behavior [19]
- Adherence [33]
- Motivation & confidence [56]
- OSN outcome [0]
- Overall OSN Use & Impression [2]
- Communication support [53]
  - Peer communication [33]
  - Patient-provider [26]
  - trust [52]
- Social support [0]
- Demographic information [0]

**Sets [0]**
